# Supplementary material
Source: publisher figshare collection journal article supplement (https://brill.figshare.com/articles/dataset/_/20550249)
Supplement: Supplementary file 1 [file 1]

# **Movement dynamics of gibbons after the construction of canopy bridges over a park road**

Chanpen Saralamba<sup>a</sup>, Juan Manuel José-Domínguez<sup>b,c</sup> and Norberto Asensio<sup>d</sup>

<sup>a</sup>Conservation Biology Program, School of Interdisciplinary Studies, Mahidol University, Kanchanaburi, 71150, Thailand

<sup>b</sup>Physical Anthropology Laboratory, Department of Legal Medicine, Toxicology and Physical Anthropology, University of Granada, Avda. de la Investigación, 18016 Granada, Spain

<sup>c</sup>Conservation Ecology Program, King Mongkut's University of Technology Thonburi, Bangkok, 10150, Thailand

<sup>d</sup>Department of Clinical and Health Psychology and Research Methodology, Faculty of Psychology, University of the Basque Country, 20018 Donostia, Gipuzkoa, Spain

\*Corresponding author; e-mail: chanpen.sar@mahidol.ac.th

ORCID iDs: Saralamba: 0000-0003-1045-9360; Asensio: 0000-0003-4536-5073

## **Supplementary material**

**Video S1.** The locomotion of gibbons (*Hylobates lar*) when crossing the bridges.

**Table S1.** Canopy bridge project timeline with milestones in collaboration with Khao Yai National Park, Thailand.

| Date                       | Description                                                                                                                                                                                                                                         |
|----------------------------|-----------------------------------------------------------------------------------------------------------------------------------------------------------------------------------------------------------------------------------------------------|
| June 2014                  | A storm broke the tree branch gibbons used for crossing. Gibbons started using the ground to cross at this location (future location of North Bridge).                                                                                              |
| 11 July 2014               | A researcher (C.S.) discussed with the park chief and park officials how to aid gibbons by designing canopy bridges at this location (future location of North Bridge) and another problematic crossing location (future location of South Bridge). |
| 17 July-28 August 2014     | A bridge project was developed, which included the design and construction of two canopy bridges, finding funding, and submitting the project to the park.                                                                                          |
| 30 August 2014             | The park chief endorsed the project.                                                                                                                                                                                                                |
| 27 September 2014          | Single rope bridges were installed to the north (North Bridge) and the south (South Bridge).                                                                                                                                                        |
| 5 October-23 November 2014 | Two camera traps were installed in the North Bridge.                                                                                                                                                                                                |
| 4 December 2014            | The park guard first reported gibbons using the South Bridge.                                                                                                                                                                                       |
| 8 December 2014            | Gibbon used the North Bridge.                                                                                                                                                                                                                       |
| 2 February 2015            | The female adult gibbon had an atypical locomotion on the South Bridge.                                                                                                                                                                             |
| 14 February 2015           | A horizontal 'ship' ladder bridge was installed to support gibbon locomotion at the South Bridge.                                                                                                                                                   |

**Table S2.** Data on gibbons (*Hylobates lar*) crossing roads at Khao Yai National Park using group follows (GF) and from bridge monitoring by the Park guard (GO) in this study. The road crossing rate for each period was calculated as the number of crossing event divided by the number of observation hours per day.

| No. | Data Set | Study Period | Date              | No. crossing events* | Crossing Rate (events/day) | Crossing/Bridge Location |
|-----|----------|--------------|-------------------|----------------------|----------------------------|--------------------------|
| 1   | GF       | Before       | March 3, 2013     | 0                    | 0                          |                          |
| 2   | GF       | Before       | March 29, 2013    | 1                    | 1.32                       | South                    |
| 3   | GF       | Before       | April 8, 2013     | 0                    | 0                          |                          |
| 4   | GF       | Before       | April 11, 2013    | 0                    | 0                          |                          |
| 5   | GF       | Before       | May 8, 2013       | 0                    | 0                          |                          |
| 6   | GF       | Before       | May 13, 2013      | 0                    | 0                          |                          |
| 7   | GF       | Before       | June 20, 2013     | 0                    | 0                          |                          |
| 8   | GF       | Before       | February 15, 2014 | 0                    | 0                          |                          |
| 9   | GF       | Before       | April 24, 2014    | 1                    | 1.46                       | North                    |
| 10  | GF       | Before       | May 31, 2014      | 2(1)                 | 2.8                        | South (others)           |
| 11  | GF       | Before       | June 8, 2014      | 0                    | 0                          |                          |
| 12  | GF       | Before       | June 9, 2014      | 3(2)                 | 3.56                       | North (others)           |
| 13  | GF       | Before       | June 10, 2014     | 1                    | 1.32                       | North                    |
| 14  | GF       | Before       | June 11, 2014     | 2(1)                 | 2.59                       | South (others)           |
| 15  | GF       | After        | October 9, 2014   | 0                    | 0                          |                          |
| 16  | GF       | After        | February 15, 2015 | 1                    | 2.21                       | North                    |
| 17  | GF       | After        | March 16, 2015    | 0                    | 0                          |                          |
| 18  | GF       | After        | July 5, 2015      | 0                    | 0                          |                          |
| 19  | GF       | After        | July 6, 2015      | 1                    | 1.31                       | South                    |
| 20  | GF       | After        | July 16, 2015     | 0                    | 0                          |                          |
| 21  | GF       | After        | July 19, 2015     | 1                    | 1.36                       | South                    |
| 22  | GF       | After        | July 21, 2015     | 1                    | 1.56                       | Ladder                   |
| 23  | GF       | After        | July 22, 2015     | 0                    | 0                          |                          |
| 24  | GF       | After        | July 26, 2015     | 0                    | 0                          |                          |
| 25  | GF       | After        | July 27, 2015     | 1                    | 2.99                       | North                    |
| 26  | GF       | After        | July 28, 2015     | 1                    | 1.99                       | North                    |
| 27  | GF       | After        | July 29, 2015     | 1                    | 1.1                        | South                    |
| 28  | GF       | After        | July 30, 2015     | 0                    | 0                          |                          |
| 29  | GF       | After        | July 31, 2015     | 2                    | 2.55                       | North                    |
| 30  | GF       | After        | August 1, 2015    | 2                    | 4.18                       | South                    |
| 31  | GF       | After        | August 2, 2015    | 2                    | 2.31                       | North                    |
| 32  | GF       | After        | August 5, 2015    | 1                    | 1.35                       | South                    |
| 33  | GF       | After        | August 6, 2015    | 2                    | 2.27                       | South & North            |

| No. | Data Set | Study Period | Date               | No. crossing events* | Crossing Rate (events/day) | Crossing/Bridge Location |
|-----|----------|--------------|--------------------|----------------------|----------------------------|--------------------------|
| 34  | GF       | After        | August 7, 2015     | 1                    | 1.53                       | South                    |
| 35  | GF       | After        | August 8, 2015     | 2                    | 2.26                       | North                    |
| 36  | GF       | After        | August 29, 2015    | 2                    | 2.26                       | North                    |
| 37  | GF       | After        | September 25, 2015 | 0                    | 0                          |                          |
| 38  | GF       | After        | September 26, 2015 | 0                    | 0                          |                          |
| 39  | GF       | After        | September 28, 2015 | 0                    | 0                          |                          |
| 40  | GF       | After        | January 3, 2016    | 0                    | 0                          |                          |
| 41  | GF       | After        | January 4, 2016    | 4                    | 4.66                       | North                    |
| 42  | GF       | After        | January 5, 2016    | 0                    | 0                          |                          |
| 43  | GF       | After        | January 6, 2016    | 0                    | 0                          |                          |
| 44  | GF       | After        | January 8, 2016    | 0                    | 0                          |                          |
| 45  | GF       | After        | January 9, 2016    | 0                    | 0                          |                          |
| 46  | GF       | After        | January 30, 2016   | 1                    | 1.26                       | North                    |
| 47  | GF       | After        | January 31, 2016   | 1                    | 1.07                       | North                    |
| 48  | GF       | After        | February 1, 2016   | 0                    | 0                          |                          |
| 49  | GF       | After        | February 27, 2016  | 0                    | 0                          |                          |
| 50  | GF       | After        | February 28, 2016  | 0                    | 0                          |                          |
| 51  | GF       | After        | February 29, 2016  | 0                    | 0                          |                          |
| 52  | GF       | After        | March 5, 2016      | 1                    | 2.3                        | North                    |
| 53  | GF       | After        | March 6, 2016      | 1                    | 1.88                       | North                    |
| 54  | GF       | After        | March 7, 2016      | 0                    | 0                          |                          |
| 55  | GF       | After        | March 8, 2016      | 0                    | 0                          |                          |
| 56  | GF       | After        | March 9, 2016      | 0                    | 0                          |                          |
| 57  | GF       | After        | March 20, 2016     | 2                    | 4.53                       | North                    |
| 58  | GF       | After        | April 10, 2016     | 0                    | 0                          |                          |
| 59  | GF       | After        | April 11, 2016     | 0                    | 0                          |                          |
| 60  | GF       | After        | April 12, 2016     | 2                    | 2.78                       | North & South            |
| 61  | GF       | After        | May 10, 2016       | 1                    | 1.85                       | Others                   |
| 62  | GF       | After        | May 11, 2016       | 1                    | 1.82                       | Others                   |
| 63  | GF       | After        | July 3, 2016       | 2                    | 2.93                       | Others                   |
| 64  | GF       | After        | July 4, 2016       | 2                    | 4.52                       | Others                   |
| 65  | GF       | After        | July 6, 2016       | 2                    | 4.74                       | Others                   |
| 66  | GF       | After        | July 14, 2016      | 1                    | 1.94                       | Others                   |
| 67  | GF       | After        | July, 16 2016      | 0                    | 0                          |                          |
| 68  | GO       | After        | January 4, 2015    | 1                    | 0.91                       | South                    |
| 69  | GO       | After        | January 5, 2015    | 1                    | 0.91                       | North                    |
| 70  | GO       | After        | March 5, 2015      | 2                    | 1.82                       | Ladder & North           |
| 71  | GO       | After        | March 6, 2015      | 1                    | 0.91                       | Ladder                   |
|     |          |              |                    |                      |                            |                          |

| No. | Data Set | Study Period | Date               | No. crossing events* | Crossing Rate (events/day) | Crossing/Bridge Location |
|-----|----------|--------------|--------------------|----------------------|----------------------------|--------------------------|
| 72  | GO       | After        | March 7, 2015      | 2                    | 1.82                       | South                    |
| 73  | GO       | After        | March 8, 2015      | 1                    | 0.91                       | North                    |
| 74  | GO       | After        | March 18, 2015     | 1                    | 0.91                       | North                    |
| 75  | GO       | After        | March 22, 2015     | 1                    | 0.91                       | North                    |
| 76  | GO       | After        | May 4, 2014        | 1                    | 0.91                       | North                    |
| 77  | GO       | After        | June 14, 2015      | 2                    | 1.82                       | Ladder & North           |
| 78  | GO       | After        | June 21, 2015      | 1                    | 0.91                       | South                    |
| 79  | GO       | After        | June 29, 2015      | 2                    | 1.82                       | North                    |
| 80  | GO       | After        | July 3, 2015       | 2                    | 1.82                       | South                    |
| 81  | GO       | After        | July 8, 2015       | 1                    | 0.91                       | South                    |
| 82  | GO       | After        | July 13, 2015      | 1                    | 0.91                       | South                    |
| 83  | GO       | After        | July 18, 2015      | 1                    | 0.91                       | South                    |
| 84  | GO       | After        | July 20, 2015      | 4                    | 3.64                       | North & Ladder           |
| 85  | GO       | After        | July 23, 2015      | 1                    | 0.91                       | South                    |
| 86  | GO       | After        | July 24, 2015      | 2                    | 1.82                       | South & North            |
| 87  | GO       | After        | July 25, 2015      | 1                    | 0.91                       | North                    |
| 88  | GO       | After        | August 4, 2015     | 2                    | 1.82                       | North & South            |
| 89  | GO       | After        | August 9, 2015     | 1                    | 0.91                       | South                    |
| 90  | GO       | After        | August 10, 2015    | 2                    | 1.82                       | South & North            |
| 91  | GO       | After        | August 11, 2015    | 1                    | 0.91                       | South                    |
| 92  | GO       | After        | August 14, 2015    | 1                    | 0.91                       | North                    |
| 93  | GO       | After        | August 18, 2015    | 2                    | 1.82                       | North                    |
| 94  | GO       | After        | August 21, 2015    | 2                    | 1.82                       | South                    |
| 95  | GO       | After        | August 22, 2015    | 5                    | 4.55                       | South/North              |
| 96  | GO       | After        | August 23, 2015    | 1                    | 0.91                       | North                    |
| 97  | GO       | After        | August 25, 2015    | 1                    | 0.91                       | North                    |
| 98  | GO       | After        | August 30, 2015    | 1                    | 0.91                       | North                    |
| 99  | GO       | After        | August 31, 2015    | 1                    | 0.91                       | North                    |
| 100 | GO       | After        | September 3, 2015  | 1                    | 0.91                       | North                    |
| 101 | GO       | After        | September 4, 2015  | 2                    | 1.82                       | South                    |
| 102 | GO       | After        | September 5, 2015  | 2                    | 1.82                       | North                    |
| 103 | GO       | After        | September 7, 2015  | 4                    | 3.64                       | North                    |
| 104 | GO       | After        | September 8, 2015  | 2                    | 1.82                       | North                    |
| 105 | GO       | After        | September 10, 2015 | 1                    | 0.91                       | North                    |
| 106 | GO       | After        | September 11, 2015 | 2                    | 1.82                       | North                    |
| 107 | GO       | After        | September 14, 2015 | 2                    | 1.82                       | North                    |
| 108 | GO       | After        | September 15, 2015 | 2                    | 1.82                       | North                    |
| 109 | GO       | After        | September 22, 2015 | 2                    | 1.82                       | North                    |

| No. | Data Set | Study Period | Date               | No. crossing events* | Crossing Rate (events/day) | Crossing/Bridge Location |
|-----|----------|--------------|--------------------|----------------------|----------------------------|--------------------------|
| 110 | GO       | After        | September 23, 2015 | 1                    | 0.91                       | South                    |
| 111 | GO       | After        | October 4, 2015    | 1                    | 0.91                       | South                    |
| 112 | GO       | After        | October 9, 2015    | 1                    | 0.91                       | South                    |
| 113 | GO       | After        | December 4, 2015   | 1                    | 0.91                       | South                    |
| 114 | GO       | After        | December 9, 2015   | 2                    | 1.82                       | South                    |
| 115 | GO       | After        | December 11, 2015  | 2                    | 1.82                       | South                    |
| 116 | GO       | After        | December 12, 2015  | 2                    | 1.82                       | South                    |

\*The number in parentheses indicates the number of crossings in locations where the bridges were not placed (others).

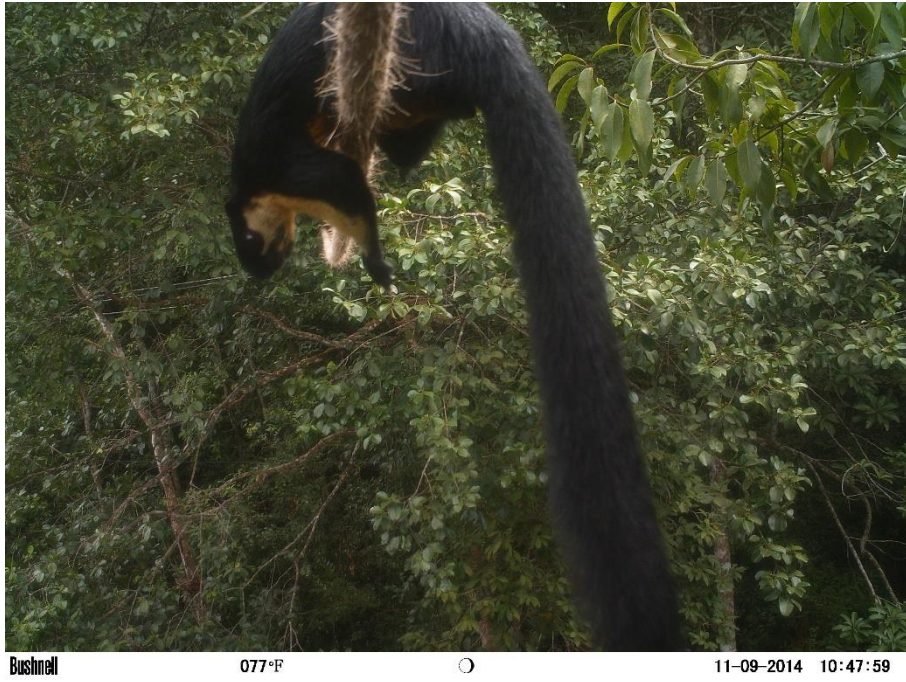

(a)

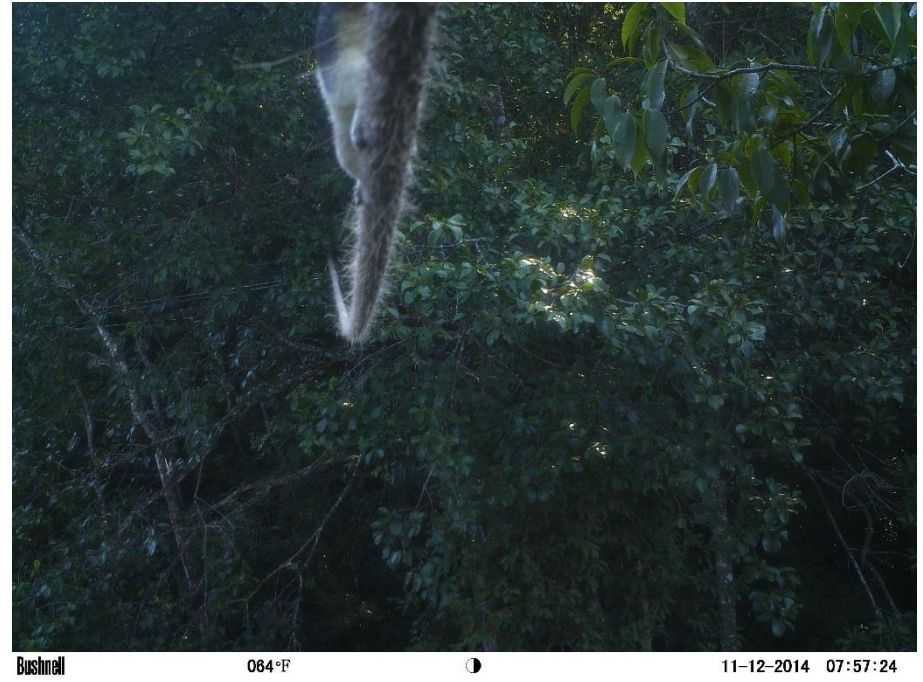

(b)



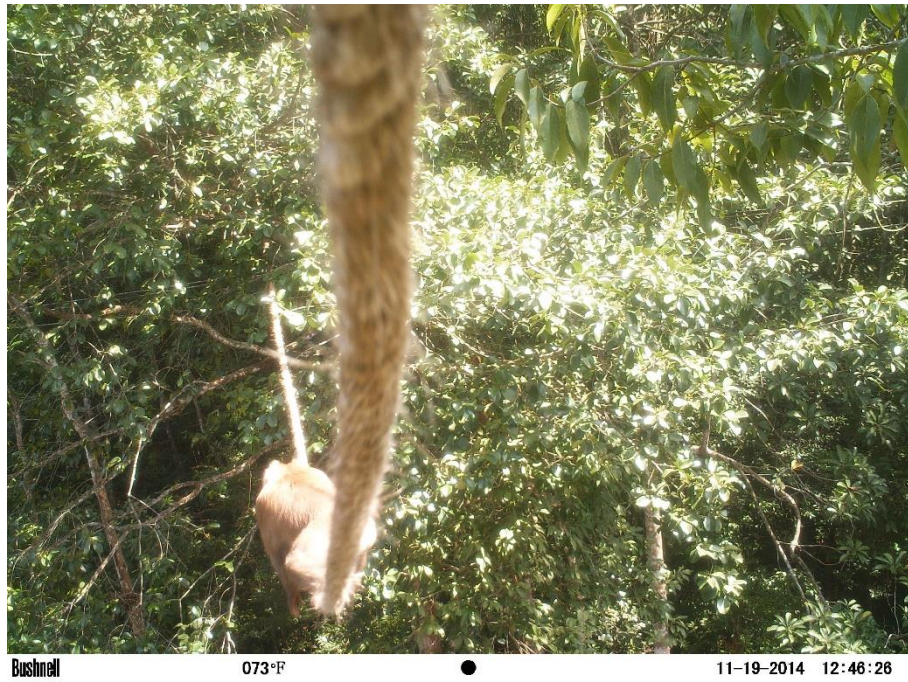

(c)

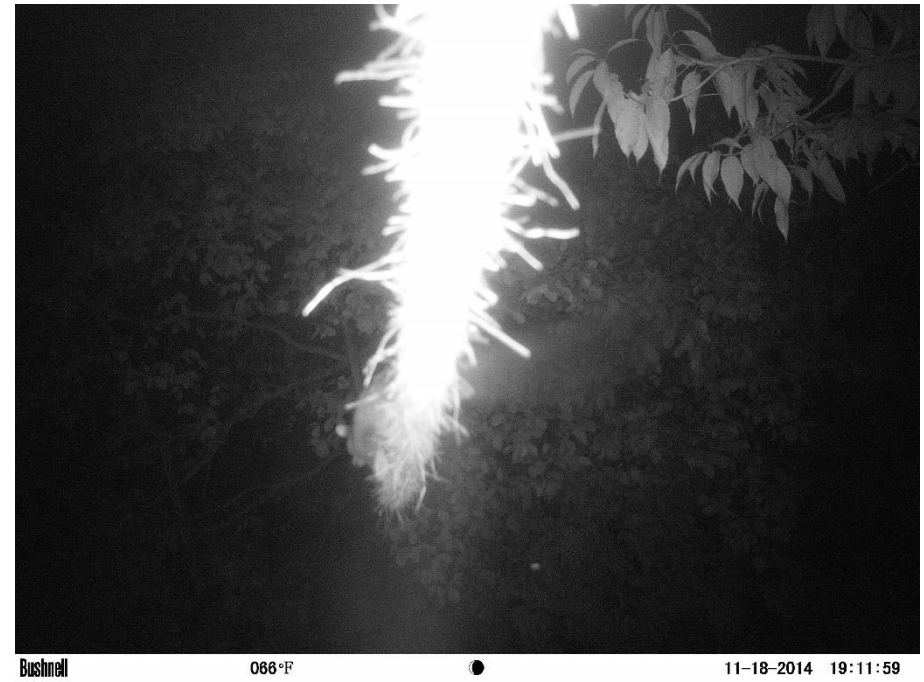

(d)

**Figure S1.** Pictures obtained from the camera traps showing other species using the canopy bridge. The first species was *Ratufa bicolor* (a), followed by *Callosciurus finlaysoni* (b) *Macaca nemestrina* (c), and *Arctogalidia trivirgata* (d).
